# Supplementary material for: Assessment of Biochar Produced by Flame-Curtain Pyrolysis as a Precursor for the Development of an Efficient Electric Double-Layer Capacitor
Source: MDPI journal article supplement (doi:10.3390/en14227671), 2021-11-16
Supplement: s1 [file s1]

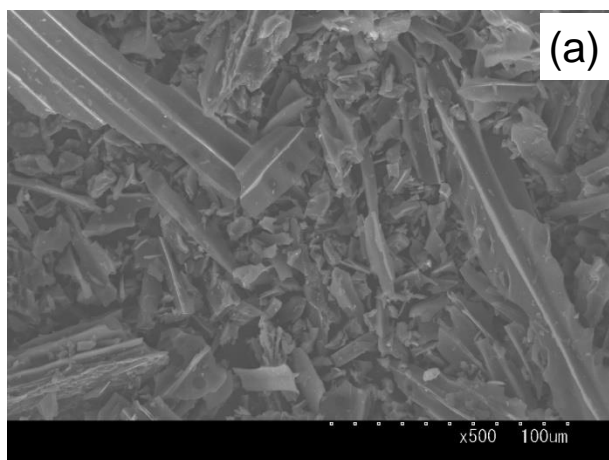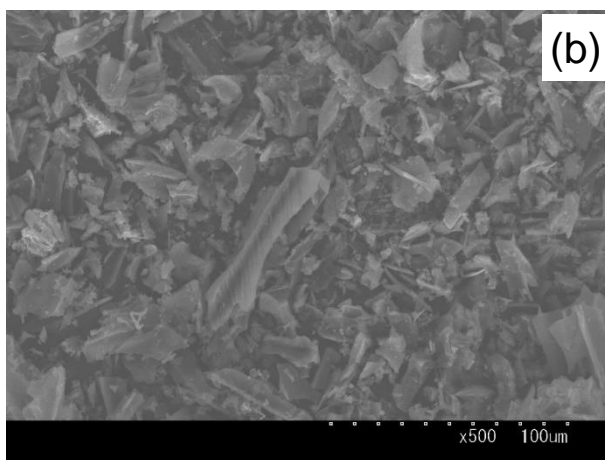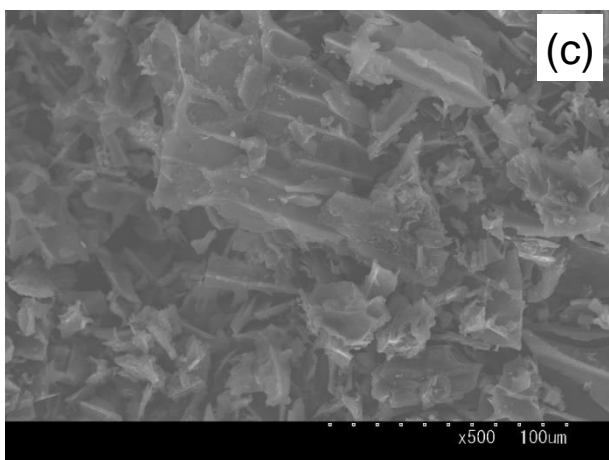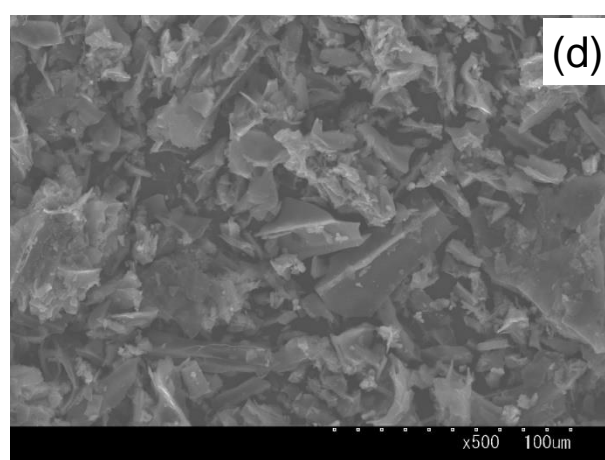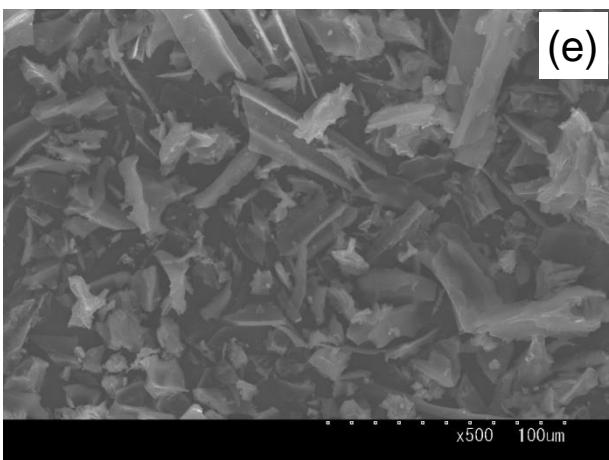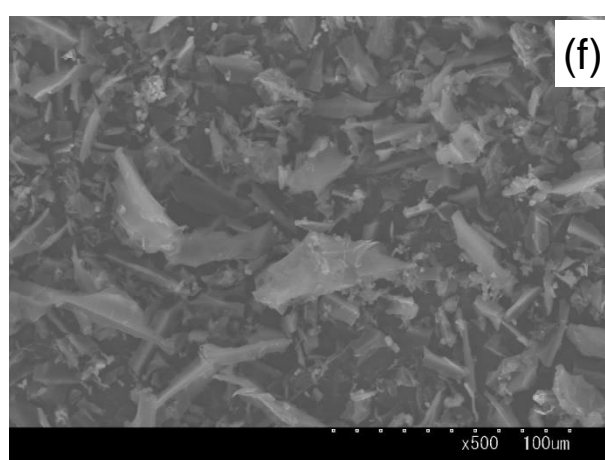

100 μm

Figure S1 SEM images of the samples after KOH activation. (a), 0 wt.%; (b), 50 wt.%; (c), 66.7 wt.%; (d), 75 wt.%; (e), 80 wt.%; (f), 85.7 wt.%.

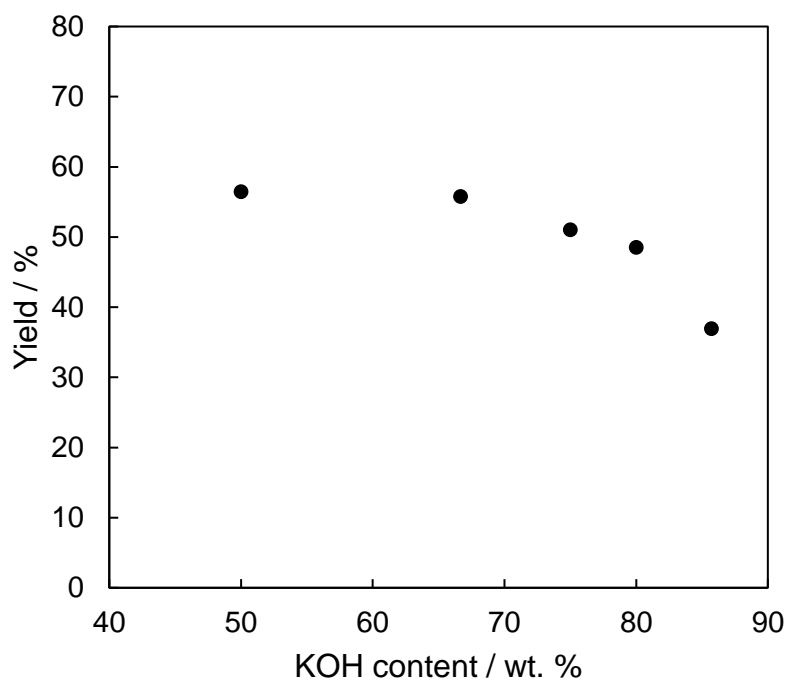

Figure S2 The yield,  $100 \times (\text{weight after KOH activation}) / (\text{weight before KOH activation})$  as a function of KOH content.

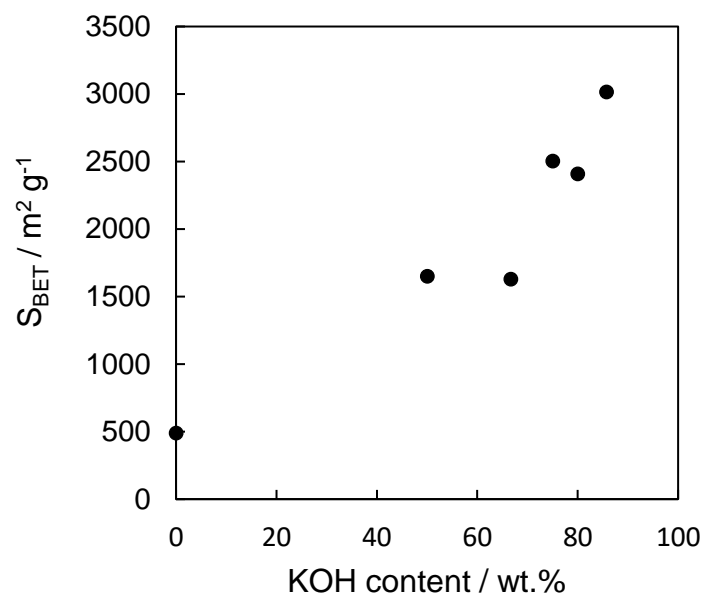

Figure S3 The BET specific surface area,  $S_{\text{BET}}$ , as the function of the added KOH.

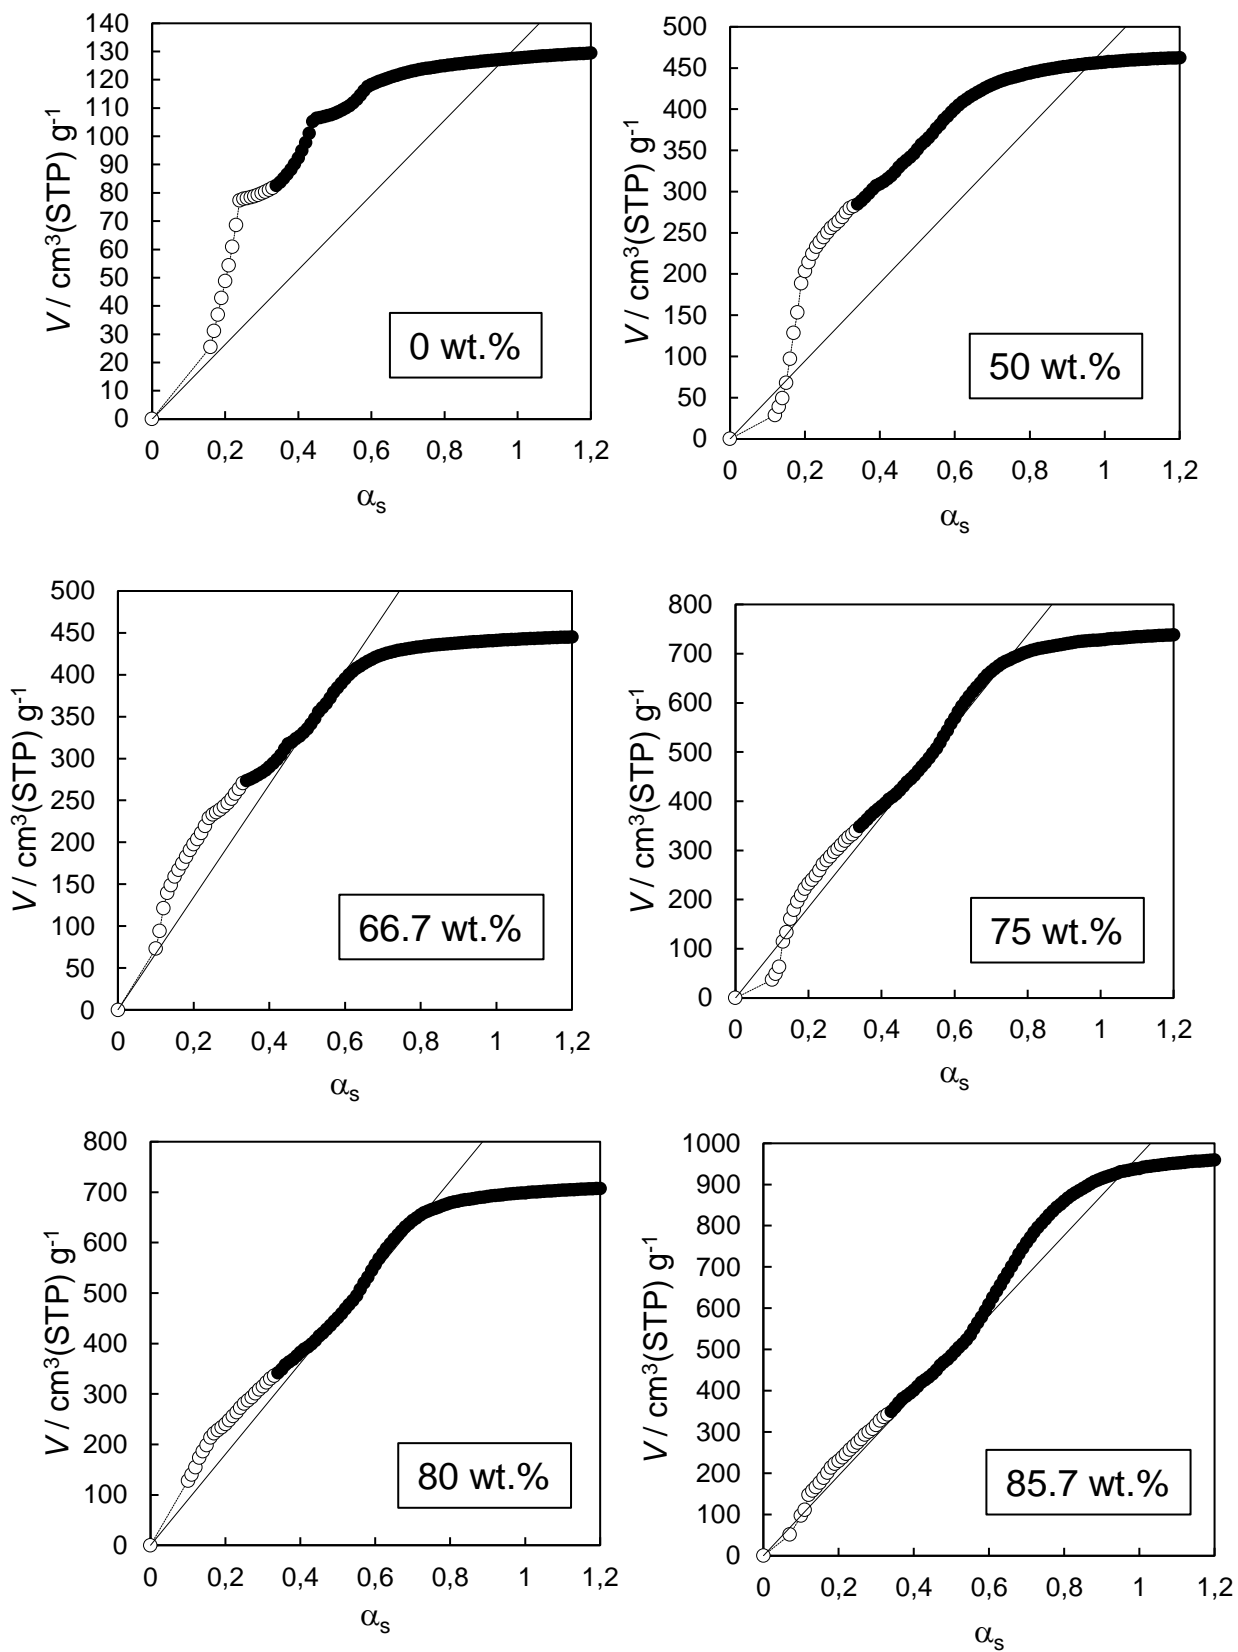

Figure S4 The  $\alpha_s$  plots of the samples.

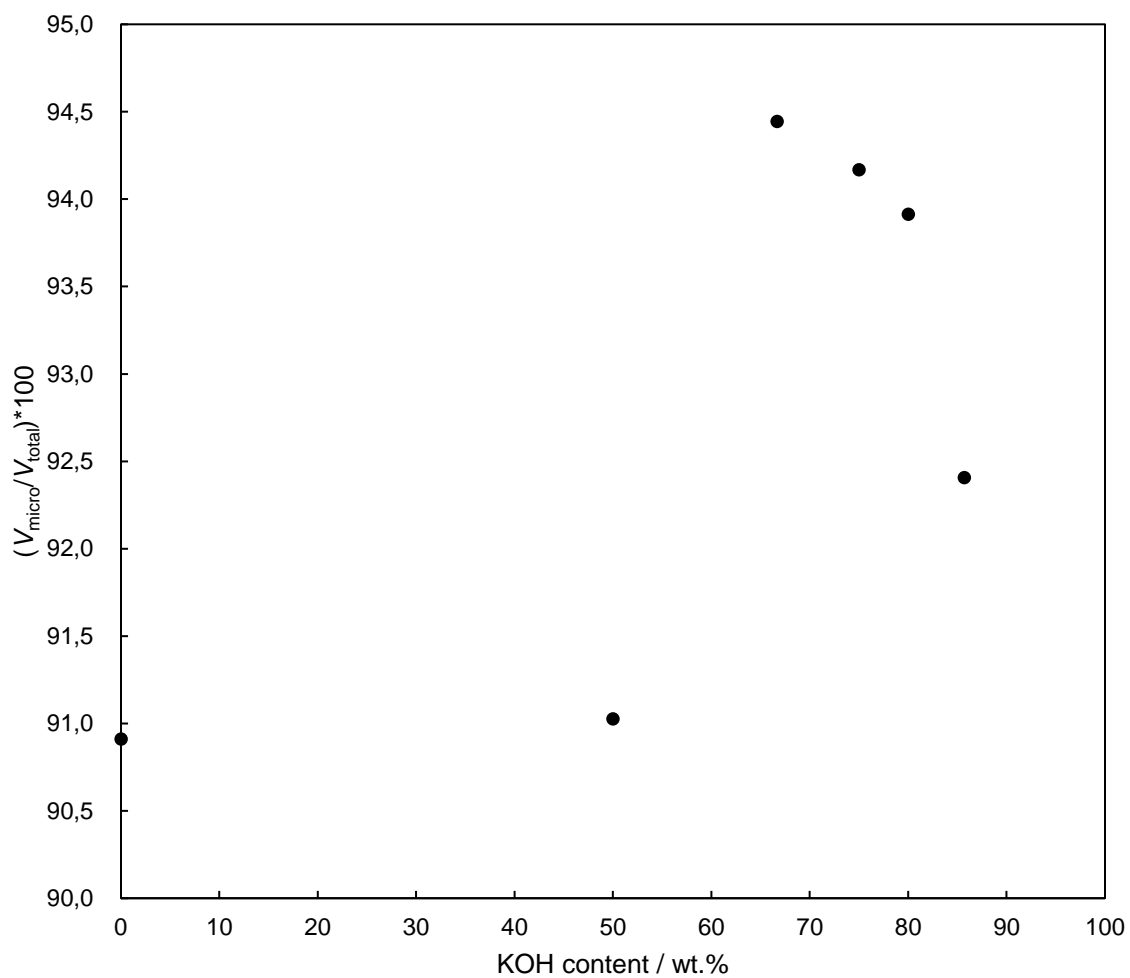

Figure S5 The  $(V_{\text{micro}}/V_{\text{total}})$  values as a function of KOH content.

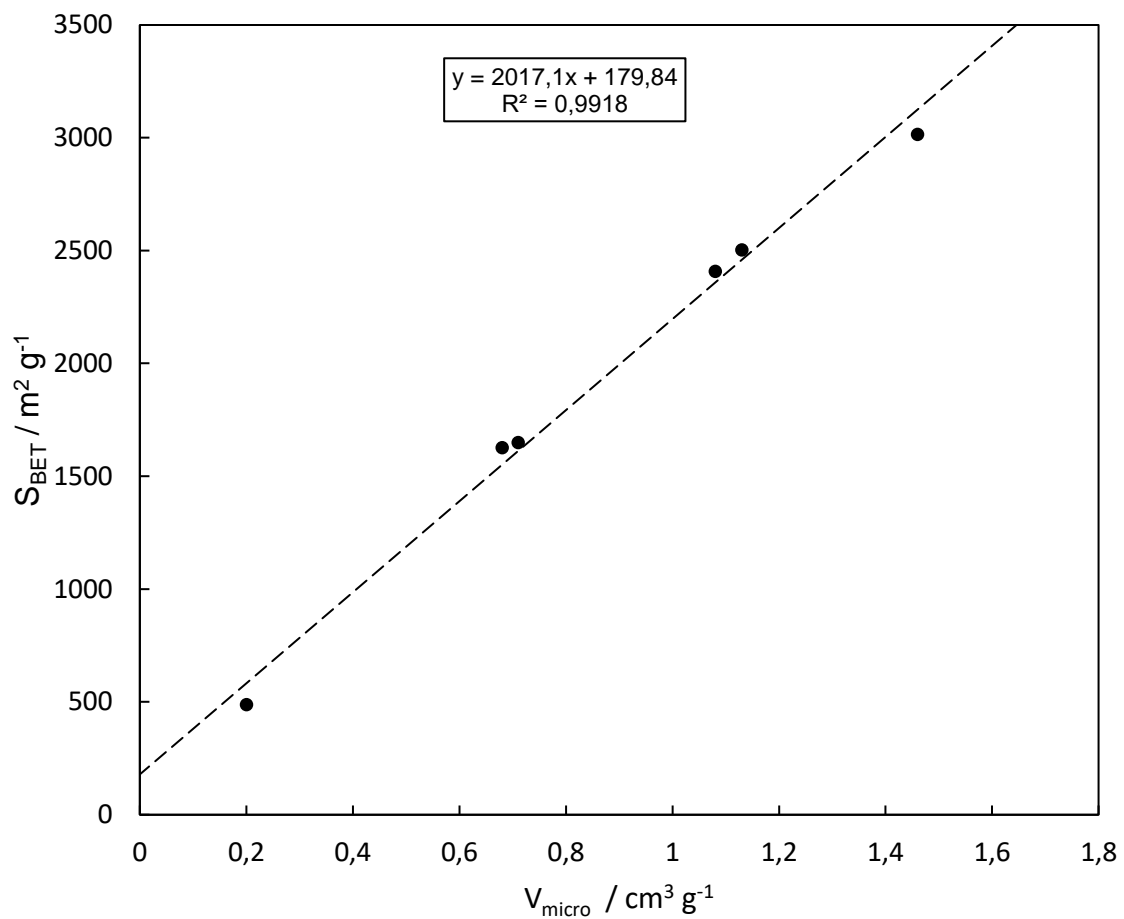

Figure S6 The relationship between the  $S_{\text{BET}}$  value and  $V_{\text{micro}}$  values.

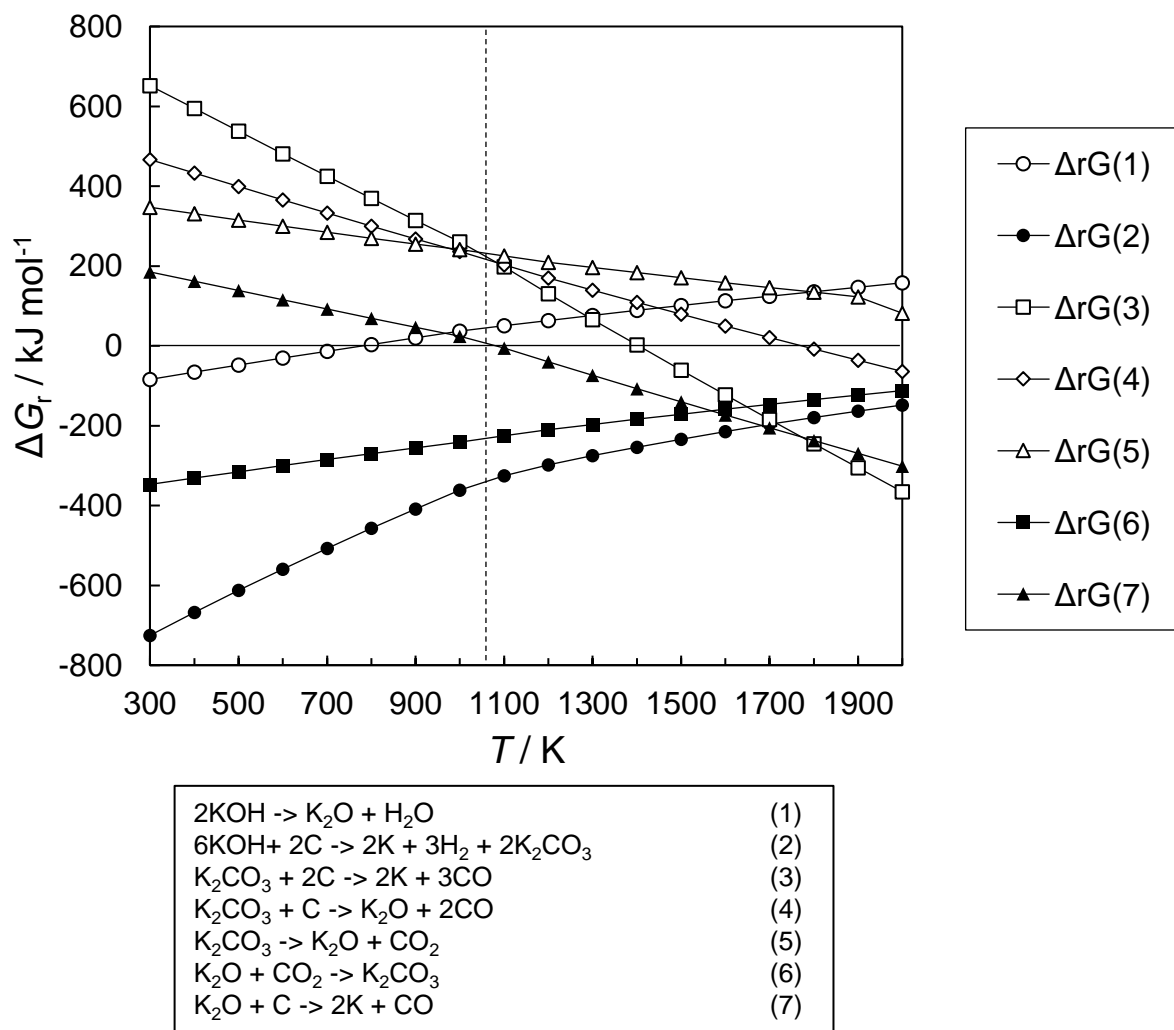

Figure S7 The temperature dependence of the Gibbs energies ( $\Delta G_r$ ) of the chemical reactions.

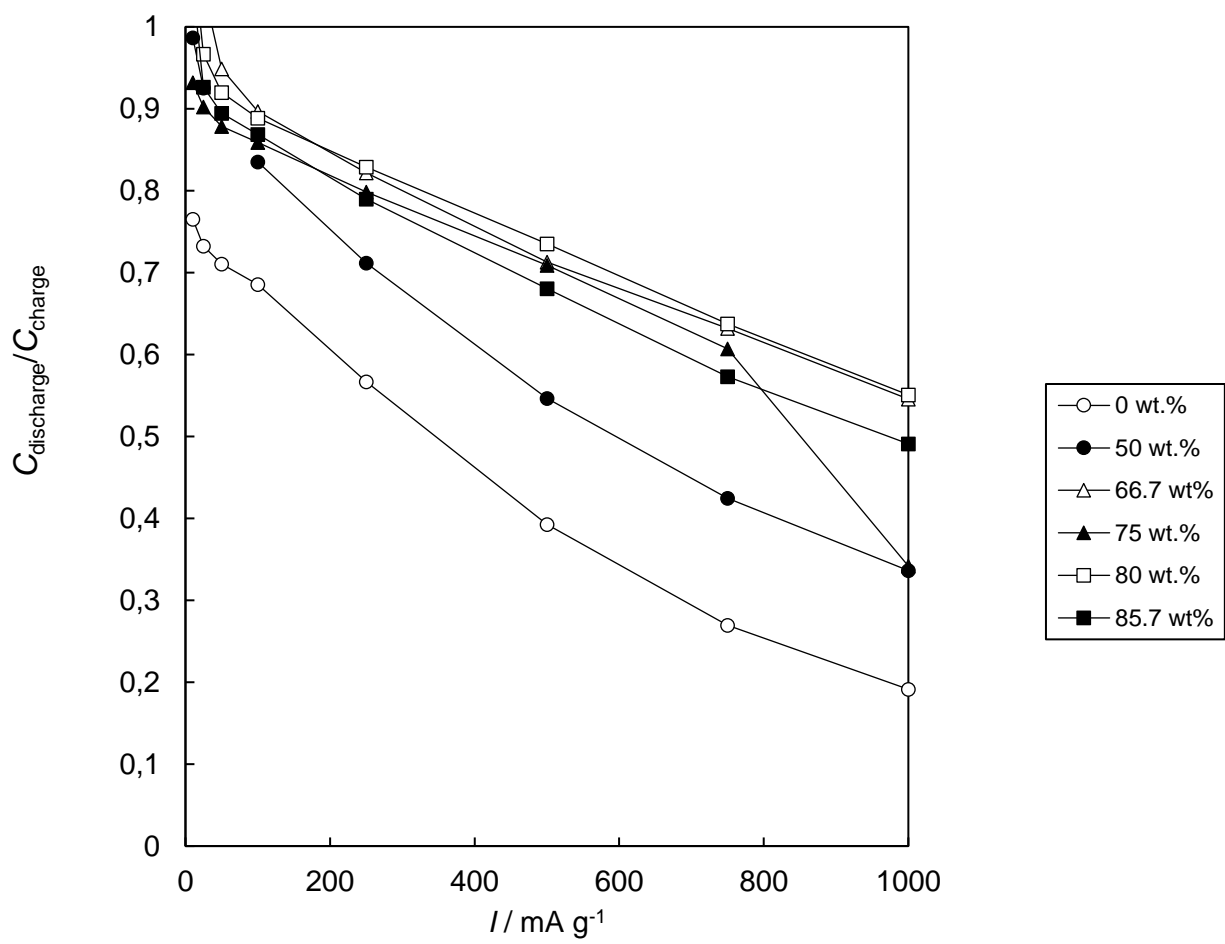

Figure S8 The capacitance values calculated from the data of charge-discharge measurements.



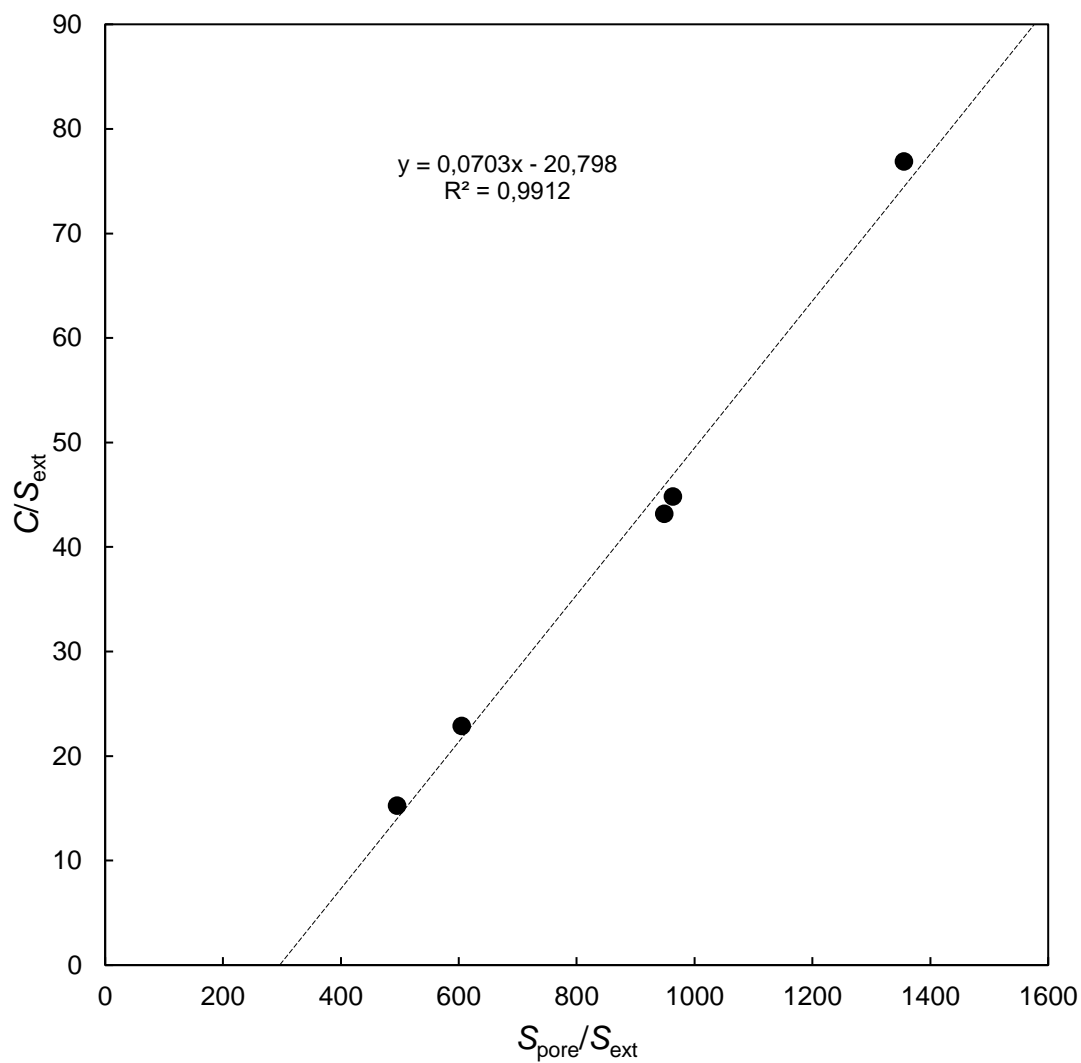

Figure S9 The relationship between the ( $C/S_{\text{ext}}$ ) values and the ( $S_{\text{pore}}/S_{\text{ext}}$ ) values of discharge process at 500 mA g<sup>-1</sup> for KOH activated samples.

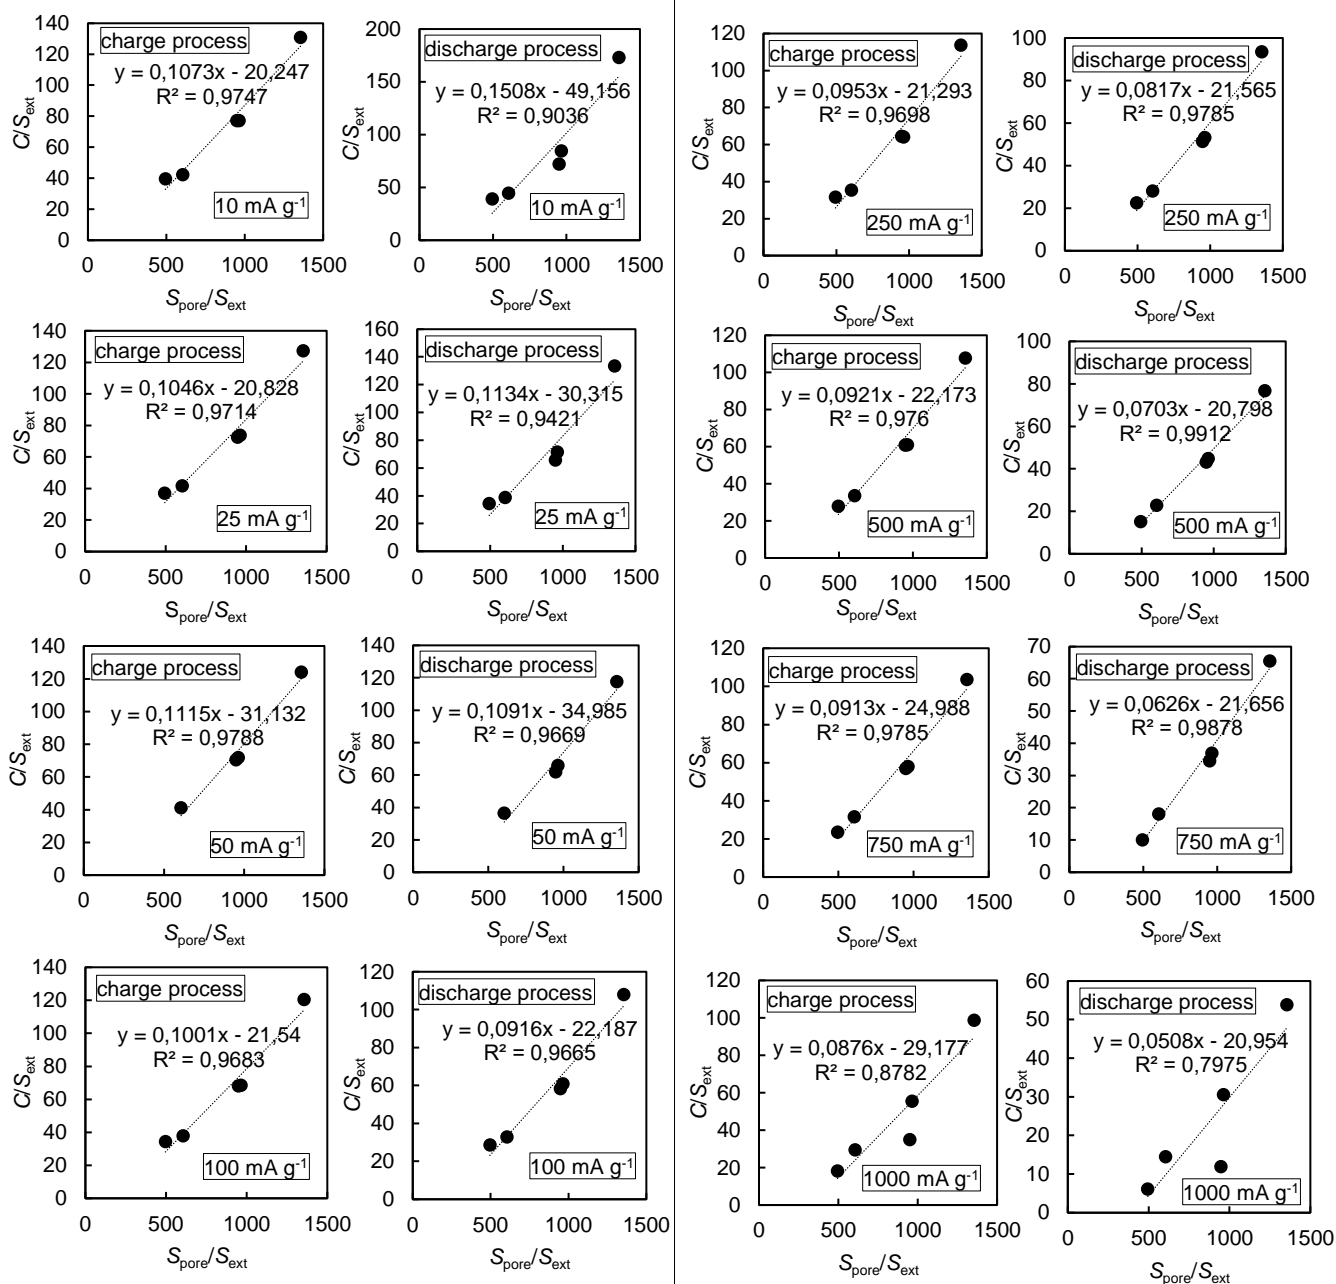

Figure S10 The relationship between the ( $C/S_{\text{ext}}$ ) values and the ( $S_{\text{pore}}/S_{\text{ext}}$ ) values of KOH activated samples.

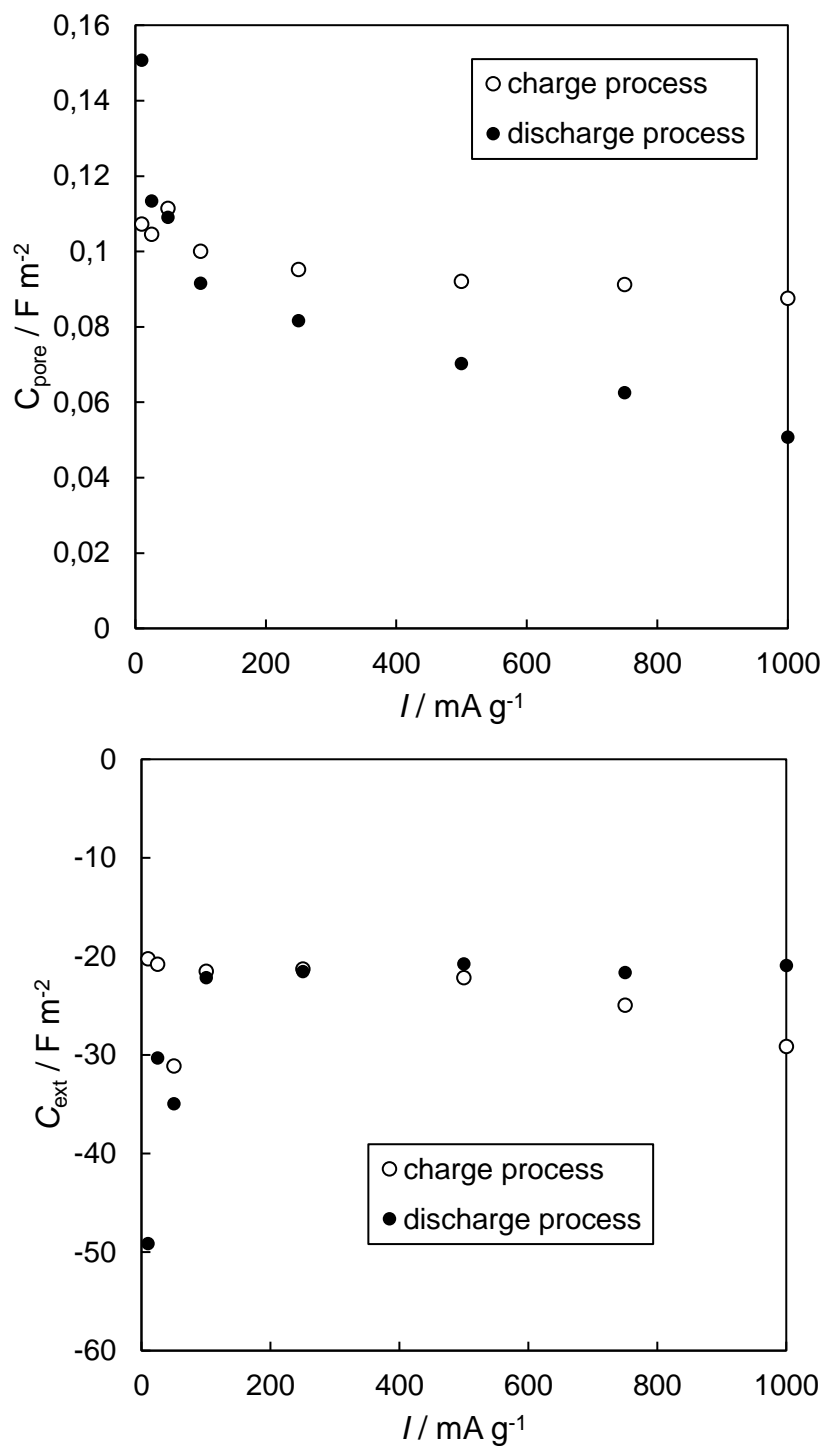

Figure S11 The estimated  $C_{\text{pore}}$  values and the estimated  $C_{\text{ext}}$  values as the function of current density.
